# Supplementary material for: Hopf Bifurcation and Control of Magnetic Bearing System with Uncertain Parameter
Source: Hindawi journal article supplement (doi:10.1155/2019/1641953), 2019-01-01
Supplement: f1 [file 1641953.f1.pdf]

## Supplementary Materials

Capital letters in the formulas of this paper are as follows:

$$\begin{aligned}(\sum_{i=0}^N y_i(t)U_i(u))^2 \sum_{i=0}^N z_i(t)U_i(u) &= \sum_{i=0}^{3N} S_i(t)U_i(u) \quad , \\(\sum_{i=0}^N x_i(t)U_i(u))^2 \sum_{i=0}^N z_i(t)U_i(u) &= \sum_{i=0}^{3N} A_i(t)U_i(u) \quad , \\(\sum_{i=0}^N z_i(t)U_i(u))^2 \sum_{i=0}^N x_i(t)U_i(u) &= \sum_{i=0}^{3N} B_i(t)U_i(u) \quad , \\(\sum_{i=0}^N x_i(t)U_i(u))^3 &= \sum_{i=0}^{3N} X_i(t)U_i(u) \quad , \\(\sum_{i=0}^N y_i(t)U_i(u))^2 \sum_{i=0}^N x_i(t)U_i(u) &= \sum_{i=0}^{3N} C_i(t)U_i(u) \quad , \\(\sum_{i=0}^N q_i(t)U_i(u))^2 \sum_{i=0}^N x_i(t)U_i(u) &= \sum_{i=0}^{3N} D_i(t)U_i(u) \quad , \\ \sum_{i=0}^N y_i(t)U_i(u) \sum_{i=0}^N q_i(t)U_i(u) \sum_{i=0}^N x_i(t)U_i(u) &= \sum_{i=0}^{3N} E_i(t)U_i(u) \quad , \\(\sum_{i=0}^N x_i(t)U_i(u))^2 \sum_{i=0}^N q_i(t)U_i(u) &= \sum_{i=0}^{3N} F_i(t)U_i(u) \quad , \\(\sum_{i=0}^N y_i(t)U_i(u))^2 \sum_{i=0}^N q_i(t)U_i(u) &= \sum_{i=0}^{3N} G_i(t)U_i(u) \quad , \\(\sum_{i=0}^N q_i(t)U_i(u))^2 \sum_{i=0}^N y_i(t)U_i(u) &= \sum_{i=0}^{3N} H_i(t)U_i(u) \quad , \\(\sum_{i=0}^N y_i(t)U_i(u))^3 &= \sum_{i=0}^{3N} Y_i(t)U_i(u) \quad , \\(\sum_{i=0}^N x_i(t)U_i(u))^2 \sum_{i=0}^N y_i(t)U_i(u) &= \sum_{i=0}^{3N} I_i(t)U_i(u) \quad , \\(\sum_{i=0}^N z_i(t)U_i(u))^2 \sum_{i=0}^N y_i(t)U_i(u) &= \sum_{i=0}^{3N} J_i(t)U_i(u) \quad , \\ \sum_{i=0}^N x_i(t)U_i(u) \sum_{i=0}^N y_i(t)U_i(u) \sum_{i=0}^N z_i(t)U_i(u) &= \sum_{i=0}^{3N} K_i(t)U_i(u) \quad .\end{aligned}$$
